# Supplementary material for: clipplotr—a comparative visualization and analysis tool for CLIP data
Source: PubMed Central journal article supplement (PMC10187674; doi:10.1261/rna.079326.122), 2023-06
Supplement: supp_079326.122_Supplemental_Fig_S1.pdf [file supp_079326.122_Supplemental_Fig_S1.pdf]

# Supplemental Figure S1

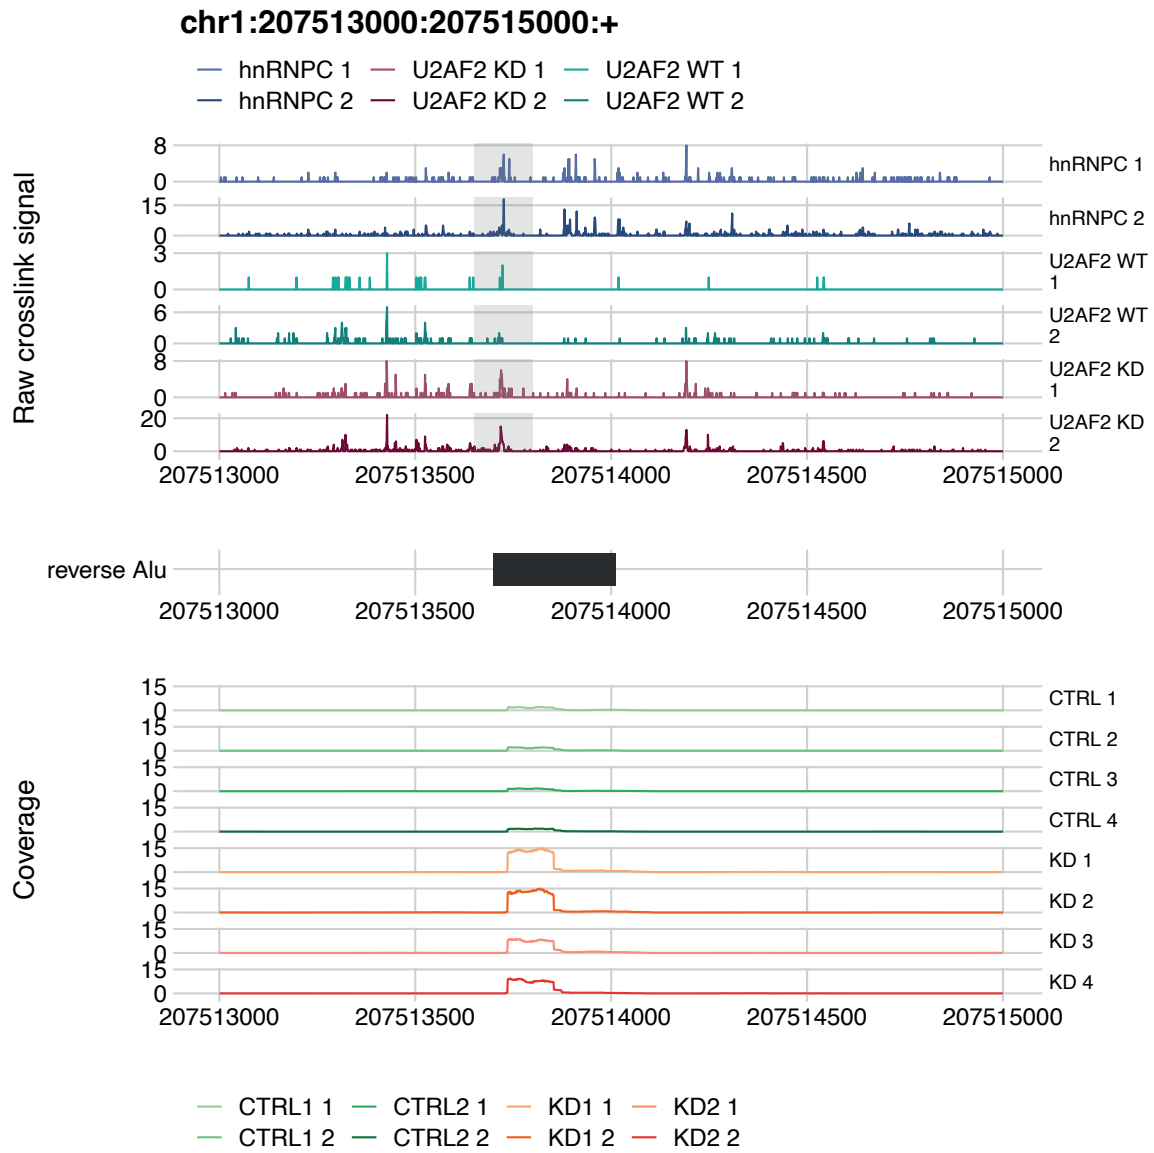

Supplemental Fig. S1. Related to Fig. 1. A reproduction using *cliplotr* of the original visualisation approach from Zarnack et al. (2013) of the CLIP and RNA-seq signal at the CD55 *Alu* exonisation locus.
