# Supplementary material for: clipplotr—a comparative visualization and analysis tool for CLIP data
Source: PubMed Central journal article supplement (PMC10187674; doi:10.1261/rna.079326.122), 2023-06
Supplement: supp_079326.122_Supplemental_Fig_S2.pdf [file supp_079326.122_Supplemental_Fig_S2.pdf]

Supplemental Figure S2

A

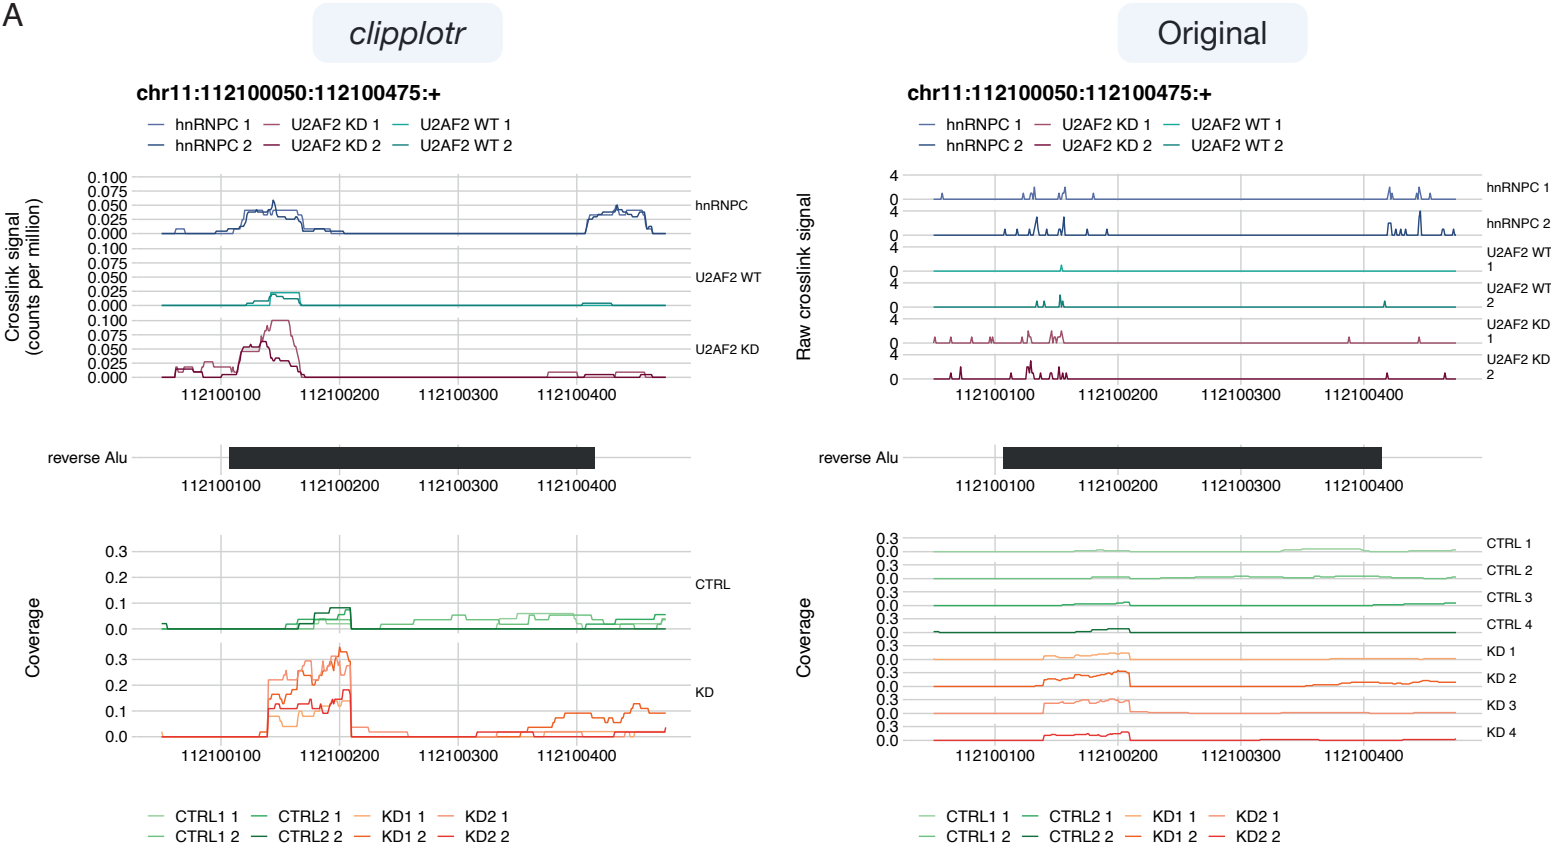

B

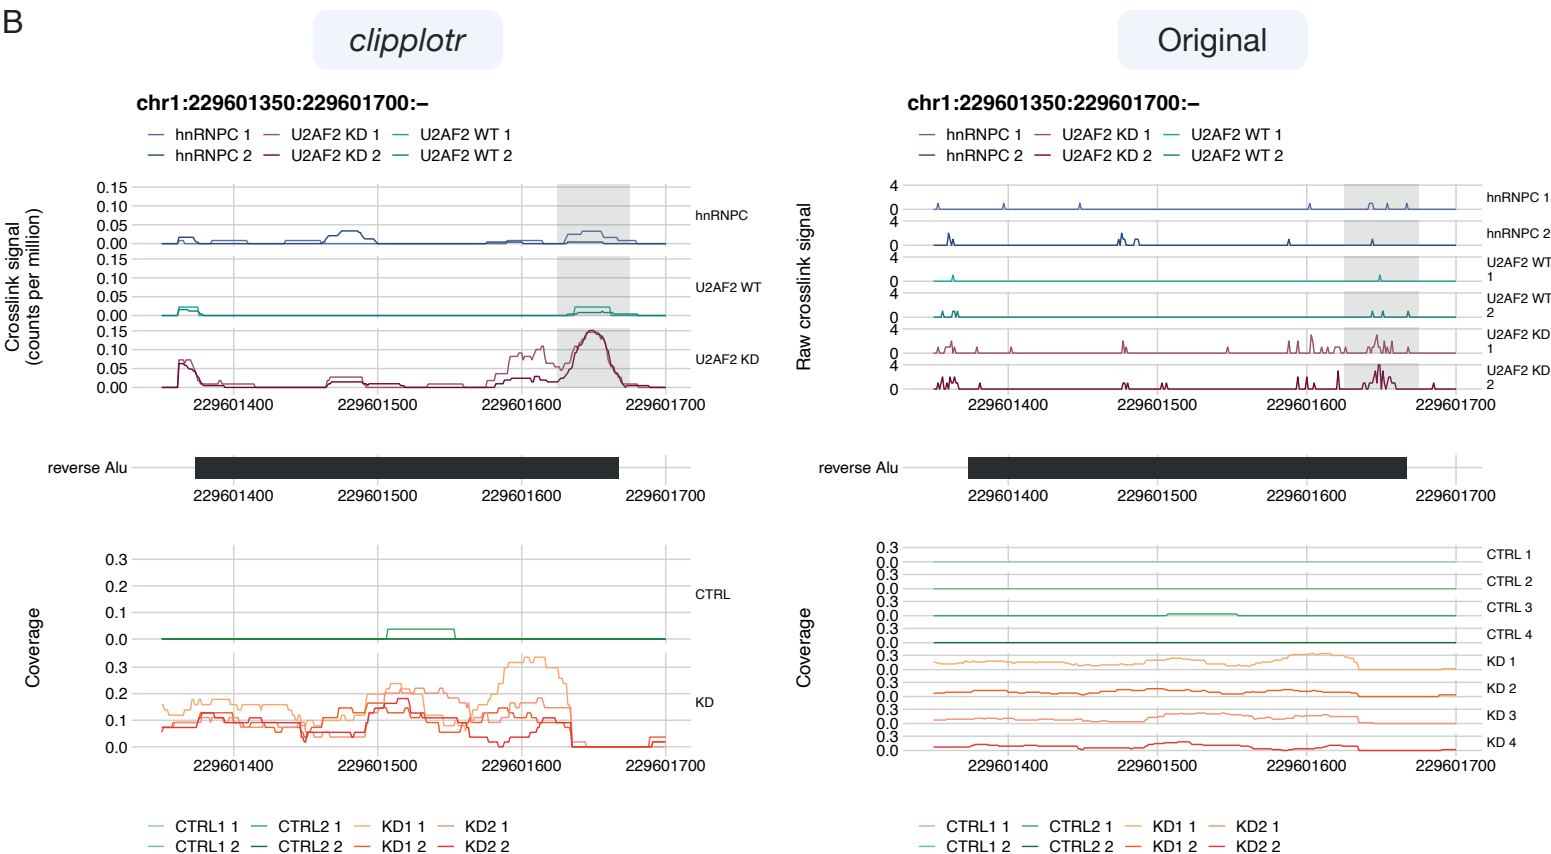

Supplemental Fig. S2. Related to Fig. 1. Examples of *clipplotr* visualisation with normalisation and smoothing of the (A) PTS and (B) NUP133 loci from Zarnack et al. (2013) are shown on the left. The original visualisation style is reproduced on the right for comparison.
